# Supplementary material for: Risk Factors of Extended-Spectrum &beta;-Lactamase Producing Enterobacteriaceae Occurrence in Farms in Reunion, Madagascar and Mayotte Islands, 2016&ndash;2017
Source: Preprints.org preprint supplement (doi:10.20944/preprints201801.0201.v1), 2018-01-22
Supplement: Supplementary file 1 [file supplementary]

# Risk factors of Extended-Spectrum $\beta$ -Lactamase producing Enterobacteriaceae occurrence in farms in Reunion, Madagascar and Mayotte Islands, 2016-2017

Name and code of the farmer : ..... Territory : .....

Date : / / 16

| Animal species | Herd size |
|----------------|-----------|
|                |           |
|                |           |

## Building

|                                                                                                      |         |       |                               |         |              |
|------------------------------------------------------------------------------------------------------|---------|-------|-------------------------------|---------|--------------|
| Presence of a water source near (plusieurs réponses possibles)<br><br>If yes, distance from the farm | River   | Pond  | Purification station or other | None    |              |
|                                                                                                      | <100m   | >100m |                               |         |              |
| Closed building                                                                                      | Yes     | No    |                               |         |              |
| Concrete access to building                                                                          | Yes     | No    |                               |         |              |
| More than one building                                                                               | Yes     | No    |                               |         |              |
| if Yes<br>Building number in the exploitation                                                        | 1       | 2     | ≥2                            |         |              |
| Age of the livestock exploitation                                                                    |         |       |                               |         |              |
| Other livestock species in the farm                                                                  | No      | Cow   | Pig                           | Poultry | Other :..... |
| Distance from another farm (same species)                                                            | < 500 m |       | > 500 m                       |         |              |
| Distance from another farm (other species raised)                                                    | < 500 m |       | > 500 m                       |         |              |
| If Yes<br>Type of species                                                                            | Cow     |       | Pig                           | Other : |              |
| Vegetable production on the farm                                                                     | Yes     | No    | Type :                        |         |              |
| Clean condition around the farm                                                                      | Yes     | No    |                               |         |              |

## Hygiene and biosecurity

| <b>Hygiene measure</b>                       |             |              |                            |        |
|----------------------------------------------|-------------|--------------|----------------------------|--------|
| Presence of a vestibule at building entrance | Yes         | No           |                            |        |
| Boot bath at building entrance               | Yes         | No           |                            |        |
| Presence of a lavabo closeby                 | Yes         | No           | Showers ?                  |        |
| Change of work clothes at building entrance  | Yes         | No           |                            |        |
| Change of shoes/boots at building entrance   | Yes         | No           |                            |        |
| Clothes and shoes                            | Durty       | Clean        |                            |        |
| Entrance frequency in the building by day    | ≤3          | 4            | >4                         |        |
| Other farmers visiting the exploitation      | Yes         | No           |                            |        |
| Share equipement with an other exploitation  | Yes         | No           |                            |        |
| Share workers with an other exploitation     | Yes         | No           |                            |        |
| Boot bath at building entrance               | Yes         | No           |                            |        |
| Respect of biosecurity measures              | Yes         | No           |                            |        |
| <b>Rendering</b>                             |             |              |                            |        |
| Management of dead livestock                 | Consumption | Buried       | Burned                     | Thrown |
|                                              |             |              |                            |        |
| <b>Water</b>                                 |             |              |                            |        |
| Type of water used in the exploitation       | Public      | river        | Rain<br>Other : well, etc. |        |
| Water storage presence                       | Yes         | No           |                            |        |
| Potable quality control                      | Yes         | No           |                            |        |
| Water filtration                             | Yes         | No           |                            |        |
| Water treatment                              | Yes         | No           |                            |        |
| Water quality control                        | Yes         | No           |                            |        |
| Cleaning of water pipes                      | Yes         | No           | No pipes                   |        |
| <b>Vector control</b>                        |             |              |                            |        |
| Présence of rodents                          | Yes         | No           |                            |        |
| Rodent control                               | None        | By farmer    | By a society               |        |
| If yes Type of control                       | Poison      | Traps        | Other :                    |        |
| Clearing around the farm                     | Yes         | No           |                            |        |
| Desinfestation                               | Yes         | No           |                            |        |
| Pet presence in the farm                     | Yes         | No           | Species :                  |        |
| Could bird enter the building                | Yes         | No           |                            |        |
| Presence of flies                            | Elevated    | Moderate     |                            |        |
| <b>Quarantine</b>                            |             |              |                            |        |
| If buying breeding stock                     |             |              |                            |        |
| Quarantine before entering the stock         | Yes         | No           |                            |        |
| Quarantaine in a different building          | Yes (>50m)  | Yes (10-50m) | No                         |        |
| All in all out practice                      | Yes         | No           |                            |        |

|                                                                           |        |          |                |
|---------------------------------------------------------------------------|--------|----------|----------------|
| Cleaning before next batch                                                | Yes    | No       |                |
| <b>Effluents</b>                                                          |        |          |                |
| Manure storage on exploitation                                            | Yes    | No       |                |
| Spreading of the manure on the exploitation                               | Yes    | No       |                |
| Si Yes                                                                    |        |          |                |
| Distance from the farm                                                    |        |          |                |
| Spreading of the manure on another farm                                   | Yes    | No       |                |
| <b>Technique de nettoyage-désinfection (concernant la bande prélevée)</b> |        |          |                |
| Scraping manure                                                           | Yes    | No       |                |
| Soaking surface                                                           | Yes    | No       |                |
| Water use for cleaning                                                    | Public | River    | rain Other :   |
| Detergent use for cleaning                                                | Yes    | No       |                |
| Cleaned surfaces                                                          | Ground | Ceiling  | Wall           |
|                                                                           |        | Through  |                |
| Application                                                               | Bucket | Sprayer  | Lather Other : |
| Pickling                                                                  | Yes    | No       |                |
| Lightning in the building                                                 | Good   | Moderate | Bad            |
| Crawlspace                                                                | Yes    | No       |                |
| Two desinfectations                                                       | Yes    | No       |                |
| Clean condition around the farm                                           | Clean  | Durty    |                |

**B – Antibiotic use :**

➤ **Motivation :** Therapeutic Prophylactic

**Last antibiotic treatment :** <1 year >1 year

**Antibiotic use in :** previous livestock sampled one
